# Supplementary material
Source: publisher figshare collection journal article supplement (https://gsapubs.figshare.com/ndownloader/files/38882889)
Supplement: Supplementary file 1 [file 38882889]

## Sheet: Feuil1
Table S3. Trace element contents
Samples	Rock typea	V	Y	Zr	Nb	La	Ce	Pr	Nd	Sm	Eu	Gd	Tb	Dy	Ho	Er	Tm	Yb	Lu	Hf	Ta	Th	Eu/Eu*b	Lacn/Smcnc	Dycn/Lucnd
		(ppm)
NA-19-06a	a	235	27.1	71	1.3	3.42	10	1.65	8.66	2.93	1.2	4.18	0.75	4.89	0.99	2.94	0.424	2.76	0.439	2.2	0.18	0.41	1.04829	0.753532	1.1139
NA-19-11a	a	172	8.4	5	< 0.2	0.25	0.88	0.18	1.16	0.66	0.339	1.02	0.22	1.49	0.31	0.89	0.134	0.82	0.124	0.2	0.04	0.06	1.26314	0.244534	1.20161
NA-19-11b	a	159	9.3	6	0.2	0.81	1.67	0.25	1.39	0.74	0.414	1.18	0.25	1.66	0.35	1.04	0.147	0.94	0.154	0.3	0.13	0.13	1.35446	0.706637	1.07792
NA-19-12a	a	136	7.4	19	0.9	1.95	4.07	0.54	2.55	0.77	0.46	1.07	0.19	1.25	0.28	0.83	0.123	0.79	0.111	0.5	< 0.01	0.29	1.54933	1.63488	1.12613
NA-19-12b	a	433	46.3	108	3.4	5.04	15.4	2.55	13.8	4.81	1.6	6.69	1.33	8.2	1.72	5.06	0.732	4.8	0.748	3.5	0.3	0.22	0.862299	0.676439	1.09626
NA-19-14b	a	224	32.4	94	1.4	3.93	12.1	2.01	10.6	3.63	1.37	4.82	0.91	5.74	1.2	3.41	0.505	3.22	0.503	2.6	0.12	0.2	1.00131	0.698922	1.14115
NA-19-21	a	240	24.5	69	2.6	3.83	10.6	1.71	8.46	2.75	1.13	3.68	0.67	4.24	0.9	2.67	0.388	2.49	0.382	1.9	0.2	0.25	1.08595	0.899102	1.10995
NA-19-24a	a	313	36.2	90	1.1	3.44	11.6	2.04	11.2	4.14	1.58	5.2	0.99	6.41	1.33	3.83	0.537	3.68	0.559	2.6	0.1	0.16	1.04107	0.536415	1.14669
NA-19-25b	a	235	30.3	99	1.9	4.98	14.6	2.26	11.3	3.93	1.43	4.78	0.87	5.44	1.14	3.33	0.501	3.24	0.497	2.8	< 0.01	0.18	1.00867	0.81805	1.09457
NA-19-36	b	236	29.7	73	2.9	4.47	12.4	1.91	10.1	3.34	1.3	4.38	0.83	5.38	1.13	3.16	0.441	2.91	0.457	2.2	0.22	0.2	1.0391	0.863981	1.17724
NA-19-37	b	260	40.4	31	5.9	3.38	11.8	2.19	12.3	4.43	1.11	5.92	1.09	7.3	1.55	4.57	0.657	4.19	0.633	0.9	0.25	0.09	0.66265	0.492557	1.15324
NA-19-38	c	104	4.9	6	< 0.2	0.2	0.74	0.13	0.76	0.38	0.344	0.74	0.14	0.96	0.19	0.58	0.087	0.57	0.079	0.2	< 0.01	< 0.05	1.98324	0.339773	1.21519
NA-19-39	c	169	6.4	4	< 0.2	0.38	1.16	0.21	1.3	0.57	0.312	0.86	0.18	1.23	0.25	0.69	0.099	0.65	0.098	0.2	< 0.01	< 0.05	1.36236	0.43038	1.2551
NA-19-40	b	441	38.5	75	4.7	3.14	10.8	1.88	10.5	4.01	1.39	5.57	1.06	6.8	1.4	4.15	0.591	3.89	0.614	2.3	0.28	< 0.05	0.899163	0.505508	1.10749
NA-19-41	b	302	22.2	37	1.6	1.72	5.67	0.98	5.43	2.06	0.839	2.93	0.58	3.87	0.83	2.5	0.368	2.5	0.403	1.2	0.1	< 0.05	1.04404	0.539019	0.960298
NA-19-42	b	314	20.3	46	2.4	1.86	6.32	1.11	6.18	2.48	0.898	3.31	0.6	3.93	0.79	2.25	0.342	2.11	0.319	1.5	< 0.01	< 0.05	0.958209	0.484177	1.23197
NA-19-43b	c	168	6.9	4	< 0.2	0.28	0.87	0.18	1.19	0.51	0.302	0.89	0.19	1.24	0.25	0.75	0.108	0.69	0.111	0.2	< 0.01	< 0.05	1.37041	0.35443	1.11712
NA-19-53b	b	141	8.6	5	< 0.2	0.25	0.96	0.18	1.28	0.58	0.361	0.96	0.2	1.39	0.31	0.98	0.151	1.04	0.166	0.2	0.02	< 0.05	1.47904	0.278263	0.837349
NA-19-54	b	395	31.4	47	2.5	1.73	6.75	1.31	8.07	3.04	1.12	4.33	0.83	5.71	1.2	3.65	0.532	3.39	0.542	1.5	0.15	< 0.05	0.943759	0.36738	1.05351
NA-19-55	b	326	29.2	64	3.2	3.08	9.54	1.62	8.72	3.07	1.09	4.19	0.8	5.23	1.08	3.24	0.468	2.97	0.47	1.9	0.22	0.05	0.929125	0.647672	1.11277
NA-19-56	b	377	53.3	138	7.6	7.72	22.3	3.55	17.8	6.19	1.87	8.01	1.48	9.2	1.97	5.84	0.836	5.42	0.854	4.1	0.62	0.26	0.811902	0.805137	1.07728
NA-19-57	c	142	6.2	4	< 0.2	0.48	1.21	0.25	1.07	0.53	0.346	0.81	0.17	1.07	0.22	0.65	0.095	0.66	0.103	0.2	0.06	< 0.05	1.61443	0.584667	1.03883
NA-19-58	c	143	5.2	2	< 0.2	0.27	0.76	0.13	0.86	0.4	0.266	0.64	0.14	0.94	0.2	0.55	0.083	0.6	0.095	0.1	0.06	< 0.05	1.60726	0.435759	0.989474
NA-19-59b	c	154	6.1	5	0.3	0.17	0.64	0.13	0.8	0.5	0.308	0.84	0.16	1.14	0.23	0.75	0.114	0.75	0.104	0.1	0.18	< 0.05	1.45295	0.219494	1.09615
TM-19-07	b	247	22	62	1.6	1.87	5.68	0.94	5.1	1.87	0.713	2.74	0.57	3.71	0.81	2.36	0.35	2.39	0.366	1.7	0.24	0.09	0.96298	0.64557	1.01366
TM-19-08	b	345	22.3	34	3.4	2.36	7.29	1.18	6.49	2.18	0.801	3	0.61	3.91	0.83	2.55	0.374	2.65	0.475	1.2	0.24	0.07	0.957563	0.698874	0.823158
TM-19-09	b	313	21.3	27	1.6	1.46	5.07	0.91	5.08	2.04	0.807	2.79	0.57	3.74	0.8	2.34	0.337	2.22	0.352	1	0.07	< 0.05	1.03414	0.462025	1.0625
TM-19-10b	c	61	2	2	< 0.2	0.54	1.14	0.15	0.71	0.2	0.312	0.33	0.06	0.32	0.06	0.21	0.033	0.22	0.034	< 0.1	0.03	< 0.05	3.71284	1.74304	0.941176
TM-19-11	c	182	10.8	14	3.7	0.89	3.03	0.54	3.1	1.19	0.514	1.77	0.33	2.05	0.41	1.15	0.166	1.12	0.177	0.4	0.35	< 0.05	1.08275	0.482821	1.15819
TM-19-12	c	128	5	5	< 0.2	0.13	0.48	0.11	0.81	0.47	0.257	0.63	0.13	0.9	0.2	0.6	0.079	0.51	0.085	0.1	0.15	< 0.05	1.4439	0.178562	1.05882
TM-19-16	b	386	32.5	41	3	2.05	7.28	1.33	7.22	2.88	1.07	3.97	0.81	5.48	1.18	3.66	0.558	3.71	0.596	1.3	0.27	0.06	0.967422	0.45952	0.919463
TM-19-17	b	490	39.5	59	4.5	2.45	8.64	1.58	8.93	3.29	1.23	4.85	0.98	6.49	1.4	4.12	0.621	4.15	0.652	2.1	0.34	0.06	0.941369	0.480743	0.995399
TM-19-18	c	83	3.2	3	< 0.2	0.31	0.72	0.1	0.65	0.28	0.216	0.45	0.09	0.54	0.12	0.35	0.052	0.34	0.058	< 0.1	0.11	< 0.05	1.86034	0.714738	0.931034
TM-19-19a	b	211	12	7	< 0.2	0.48	1.68	0.33	2.2	0.98	0.576	1.59	0.33	2.17	0.44	1.36	0.207	1.3	0.221	0.3	0.17	< 0.05	1.4107	0.316197	0.9819
TM-19-19b	b	216	10.4	7	< 0.2	0.42	1.59	0.34	2.08	1.01	0.543	1.59	0.3	1.88	0.39	1.09	0.157	1.01	0.162	0.3	0.09	< 0.05	1.30998	0.268455	1.16049
TM-19-19c	c	139	5.7	6	0.7	1.42	2.91	0.32	1.34	0.5	0.343	0.77	0.15	1	0.22	0.64	0.1	0.64	0.101	0.2	0.15	< 0.05	1.69	1.83342	0.990099
15-JDF-18a	b	268	22.2	58	1.1	3.15	8.3	1.27	6.66	2.41	0.954	3.17	0.63	4.1	0.84	2.34	0.344	2.24	0.348	1.5	0.1	0.25	1.0552	0.843794	1.17816
15-JDF-18b	b	416	40	88	3.7	4.9	13.4	2.18	11.3	4.16	1.43	5.61	1.03	6.87	1.44	4.18	0.646	4.34	0.678	2.3	0.3	0.37	0.904965	0.760407	1.01327
15-JDF-18c	b	382	37.8	115	4.9	6.64	17	2.48	12.7	4.45	1.62	5.71	1.05	6.52	1.38	3.93	0.575	4.09	0.63	2.9	0.36	0.5	0.982518	0.963277	1.03492
15-JDF-18d	b	367	38.5	101	3.5	5.06	13.7	2.14	11	3.83	1.42	5.31	0.93	6.42	1.33	3.85	0.58	3.79	0.616	2.5	0.24	0.42	0.962643	0.852894	1.04221
15-JDF-19b	b	399	62.2	52	5.5	4.46	15.7	2.69	14.7	5.3	1.76	7.1	1.45	10	2.25	7.21	1.13	7.64	1.28	1.5	0.4	0.37	0.877141	0.543253	0.78125
15-JDF-20a	c	148	7.5	5	< 0.2	0.43	1.02	0.16	0.93	0.52	0.274	0.87	0.19	1.38	0.29	0.87	0.127	0.84	0.124	0.2	< 0.01	< 0.05	1.24541	0.533836	1.1129
15-JDF-20b	c	92	5.7	3	< 0.2	0.82	1.66	0.25	1.21	0.37	0.256	0.67	0.13	0.97	0.2	0.59	0.088	0.57	0.095	0.1	< 0.01	0.08	1.5719	1.43072	1.02105
15-JDF-20c	c	127	6.2	4	< 0.2	0.23	0.52	0.1	0.7	0.4	0.3	0.73	0.15	1.07	0.23	0.71	0.108	0.75	0.119	0.1	< 0.01	< 0.05	1.69728	0.371203	0.89916
15-JDF-20d	b	379	36.7	139	3.9	4.6	13.4	2.13	11.2	4.13	1.29	5.27	0.95	6.18	1.31	3.86	0.558	3.81	0.577	3.3	0.25	0.16	0.845343	0.719036	1.07106
15-JDF-24b	c	134	6	4	< 0.2	0.41	0.83	0.16	1	0.52	0.364	0.77	0.16	1.05	0.22	0.63	0.094	0.62	0.095	0.2	< 0.01	< 0.05	1.75864	0.509007	1.10526
15-JDF-26	b	295	14.7	12	< 0.2	0.36	1.37	0.33	2.34	1.14	0.53	1.95	0.38	2.57	0.54	1.58	0.245	1.6	0.246	0.3	< 0.01	< 0.05	1.08675	0.203864	1.04472
15-JDF-27a	c	141	6.2	6	< 0.2	0.33	0.93	0.17	1.02	0.52	0.31	0.79	0.16	1.1	0.23	0.66	0.101	0.68	0.105	0.2	< 0.01	< 0.05	1.47867	0.409688	1.04762
15-JDF-27b	b	225	27.4	60	2.4	4.62	11.8	1.78	8.89	2.87	1.25	4.08	0.73	4.68	0.98	2.83	0.414	2.73	0.404	1.6	0.18	0.27	1.11677	1.03921	1.15842
15-JDF-28a	c	52	1.8	3	< 0.2	0.34	0.63	0.09	0.47	0.24	0.163	0.24	0.05	0.3	0.06	0.2	0.031	0.2	0.028	< 0.1	< 0.01	0.06	2.07635	0.914557	1.07143
15-JDF-28b	c	97	4.3	6	< 0.2	0.42	0.83	0.18	1.02	0.34	0.333	0.55	0.11	0.77	0.15	0.41	0.058	0.39	0.064	0.2	< 0.01	< 0.05	2.35422	0.797468	1.20312
15-JDF-28c	c	109	4.3	4	< 0.2	0.38	0.73	0.16	0.94	0.5	0.394	0.71	0.12	0.75	0.16	0.45	0.061	0.38	0.056	0.1	< 0.01	< 0.05	2.02165	0.490633	1.33929
15-JDF-30a	c	122	7.2	5	< 0.2	0.68	1.45	0.22	1.12	0.51	0.311	0.85	0.17	1.14	0.26	0.76	0.11	0.69	0.11	0.1	< 0.01	0.06	1.44407	0.860759	1.03636
15-JDF-30b	c	117	5.1	6	< 0.2	0.39	0.86	0.16	0.83	0.36	0.301	0.59	0.13	0.88	0.19	0.53	0.081	0.53	0.088	0.2	< 0.01	< 0.05	1.9967	0.699367	1
15-JDF-32a	b	250	18.2	29	0.5	1.77	5.31	0.88	4.62	1.72	0.794	2.46	0.44	3.07	0.64	1.83	0.288	1.92	0.307	0.8	0.03	0.06	1.18008	0.664336	1
15-JDF-32b	b	415	39.4	105	3.7	4.75	14.2	2.26	12.1	4.15	1.5	5.66	1.02	6.77	1.43	4.17	0.6	4.03	0.63	2.7	0.26	0.13	0.946199	0.738905	1.0746
15-JDF-36	b	385	34.1	59	2.2	2.5	8.64	1.5	8.78	3.27	1.22	4.81	0.89	5.78	1.19	3.57	0.533	3.51	0.548	1.7	0.15	0.06	0.940453	0.493555	1.05474
15-JDF-39	b	232	15.7	26	< 0.2	1.01	3.33	0.6	3.68	1.39	0.607	2.2	0.42	2.73	0.58	1.7	0.244	1.59	0.239	0.7	< 0.01	< 0.05	1.06119	0.469083	1.14226
15-JDF-40	a	371	34.9	91	3.8	4.28	12.5	2.01	10.2	3.82	1.36	5.16	0.91	6.11	1.22	3.54	0.525	3.52	0.544	2.4	0.24	0.19	0.936496	0.723308	1.12316
15-JDF-66	a	364	37.2	113	3.9	6.44	16.8	2.51	12.3	4.43	1.42	5.57	1.01	6.51	1.34	3.82	0.584	3.78	0.564	2.8	0.41	0.42	0.873942	0.93848	1.15426
14-CG-06d	c	179	7.3	20	N.D.	0.57	1.34	0.24	1.35	0.62	0.279	0.88	0.19	1.25	0.27	0.8	0.116	0.79	0.119	0.5	0.04	0.07	1.15476	0.593508	1.05042
14-CG-06e	c	118	3.9	3	N.D.	0.34	0.71	0.13	0.75	0.34	0.268	0.51	0.11	0.72	0.14	0.41	0.063	0.4	0.058	0.2	0.03	N.D.	1.96759	0.64557	1.24138
14-CG-06f	b	217	11.8	10	N.D.	0.64	1.92	0.36	2.05	0.91	0.468	1.48	0.31	2.16	0.46	1.41	0.216	1.39	0.222	0.3	0.02	0.11	1.23287	0.454027	0.972973
9495	c	187	8.4	6	< 0.2	0.31	1.18	0.24	1.62	0.73	0.451	1.16	0.23	1.51	0.32	0.95	0.14	0.91	0.146	0.2	0.11	< 0.05	1.49834	0.274146	1.03425
a - Rock type: a = Common amphibolite; b = Grt-Cpx amphibolite; c = Cpx-Grt granulite
b - Eu/SQRT(Sm*Gd). Normalized with condritic values from Sun and Mcdonough (1989).
c, d - Normalized with condritic values from Sun and Mcdonough (1989).
